# Supplementary material for: The use of early warning system scores in prehospital and emergency department settings to predict clinical deterioration: A systematic review and meta-analysis
Source: PubMed Central journal article supplement (PMC8929648; doi:10.1371/journal.pone.0265559), 2022-03-17
Supplement: pone.0265559.s002.pdf [file pone.0265559.s002.pdf]

## Supplementary file 1

## PICO question

### Population

Adult population who presented to Emergency Departments (EDs).

### Interventions

All 5 EWS scores will be interventions for the target population.

1. Modified Early Warning Scores
2. National Early Warning Scores
3. National Early Warning Scores 2
4. Rapid Acute Physiological Score
5. Cardiac Arrest Risk Triage

### Comparison

Nil

### Outcomes

- Mortality rate (3 and 30 days)
- Length of stay
- Cardiac arrest
- Respiratory arrest
- ICU admission
