# Supplementary material for: The use of early warning system scores in prehospital and emergency department settings to predict clinical deterioration: A systematic review and meta-analysis
Source: PubMed Central journal article supplement (PMC8929648; doi:10.1371/journal.pone.0265559), 2022-03-17
Supplement: pone.0265559.s003.pdf [file pone.0265559.s003.pdf]

EMBASE SEARCH HISTORY

Ovid Technologies, Inc. Email Service

-----

Search for: limit 15 to yr="2020 -Current"

Results: 290

Database: Embase Classic+Embase <1947 to 2021 February 15>

Search Strategy:

-----

- 1 exp \*Emergency Medical Technicians/ or exp \*Ambulances/ (8562)
- 2 (paramedic\* or ems or emergency medical service\* or pre-hospital or pre-hospital or ambulance\* or emergency medical technician\* or emt or (out-of-hospital or "out of hospital")).mp. [mp=title, abstract, heading word, drug trade name, original title, device manufacturer, drug manufacturer, device trade name, keyword, floating subheading word, candidate term word] (136461)
- 3 exp \*Emergency Service, Hospital/ (1488)
- 4 (emergency department\* or emergency room\* or "accident\* and emergency" or "accident\* & emergency" or "a&e" or "a & e" or "A and E" or ("ER" or " ED")).mp. [mp=title, abstract, heading word, drug trade name, original title, device manufacturer, drug manufacturer, device trade name, keyword, floating subheading word, candidate term word] (1808541)
- 5 exp \*"severity of illness index"/ or exp \*early warning score/ (2042)
- 6 (early warning sign\* or early warning system\* or early warning score\* or early warning

score system\* or ews or  
trigger score or ("track and trigger" or "track and trigger system\*")).mp. [mp=title, abstract,  
heading word, drug trade  
name, original title, device manufacturer, drug manufacturer, device trade name, keyword,  
floating subheading word,  
candidate term word] (9483)

7 (national early warning score2\* or national early warning score system 2\* or NEWS2 or  
NEWS 2).mp. [mp=title,  
abstract, heading word, drug trade name, original title, device manufacturer, drug  
manufacturer, device trade name,  
keyword, floating subheading word, candidate term word] (160)

8 (national early warning score\* or national early warning score system\* or NEWS).mp.  
[mp=title, abstract, heading  
word, drug trade name, original title, device manufacturer, drug manufacturer, device trade  
name, keyword, floating  
subheading word, candidate term word] (26024)

9 (modified early warning score\* or modified early warning score system\* or MEWS).mp.  
[mp=title, abstract, heading  
word, drug trade name, original title, device manufacturer, drug manufacturer, device trade  
name, keyword, floating  
subheading word, candidate term word] (707)

10 (rapid acute physiology score\* or rapid acute physiology score system\* or RAPS).mp.  
[mp=title, abstract, heading  
word, drug trade name, original title, device manufacturer, drug manufacturer, device trade  
name, keyword, floating  
subheading word, candidate term word] (543)

11 (Cardiac arrest risk triage or Cardiac arrest risk triage score or CART).mp. [mp=title,  
abstract, heading word,  
drug trade name, original title, device manufacturer, drug manufacturer, device trade name,  
keyword, floating subheading  
word, candidate term word] (13244)

12 1 or 2 or 3 or 4 (1930574)

- 13 5 or 6 or 7 or 8 or 9 or 10 or 11 (50499)
- 14 12 and 13 (3433)
- 15 limit 14 to english language (3145)
- 16 limit 15 to yr="2020 -Current" (290)

## MEDLINE SEARCH HISTORY

Ovid Technologies, Inc. Email Service

-----  
Search for: limit 15 to yr="2020 -Current"

Results: 253

Database: Ovid MEDLINE(R) ALL <1946 to February 15, 2021>

Search Strategy:  
-----

- 1 exp \*Emergency Medical Technicians/ or exp \*Ambulances/ (9735)
- 2 (paramedic\* or ems or emergency medical service\* or pre-hospital or pre-hospital or ambulance\* or emergency medical technician\* or emt or (out-of-hospital or "out of hospital")).mp. [mp=title, abstract, original title, name of substance word, subject heading word, floating sub-heading word, keyword heading word, organism supplementary concept word, protocol supplementary concept word, rare disease supplementary concept word, unique identifier, synonyms] (111027)
- 3 exp \*Emergency Service, Hospital/ (47656)
- 4 (emergency department\* or emergency room\* or "accident\* and emergency" or "accident\* & emergency" or "a&e" or "a & e" or "A and E" or ("ER" or " ED")).mp. [mp=title, abstract, original title, name of substance word, subject heading word, floating sub-heading word, keyword heading word, organism supplementary concept word, protocol supplementary concept word, rare disease supplementary concept word, unique identifier, synonyms] (315256)
- 5 exp \*"severity of illness index"/ or exp \*early warning score/ (22344)
- 6 (early warning sign\* or early warning system\* or early warning score\* or early warning

score system\* or ews or

trigger score or ("track and trigger" or "track and trigger system\*")).mp. [mp=title, abstract, original title, name of

substance word, subject heading word, floating sub-heading word, keyword heading word, organism supplementary concept

word, protocol supplementary concept word, rare disease supplementary concept word, unique identifier, synonyms] (6582)

7 (national early warning score<sup>2</sup>\* or national early warning score system 2\* or NEWS<sup>2</sup> or NEWS 2).mp. [mp=title,

abstract, original title, name of substance word, subject heading word, floating sub-heading word, keyword heading word,

organism supplementary concept word, protocol supplementary concept word, rare disease supplementary concept word,

unique identifier, synonyms] (107)

8 (national early warning score\* or national early warning score system\* or NEWS).mp.

[mp=title, abstract, original

title, name of substance word, subject heading word, floating sub-heading word, keyword heading word, organism

supplementary concept word, protocol supplementary concept word, rare disease supplementary concept word, unique

identifier, synonyms] (225325)

9 (modified early warning score\* or modified early warning score system\* or MEWS).mp.

[mp=title, abstract, original

title, name of substance word, subject heading word, floating sub-heading word, keyword heading word, organism

supplementary concept word, protocol supplementary concept word, rare disease supplementary concept word, unique

identifier, synonyms] (396)

10 (rapid acute physiology score\* or rapid acute physiology score system\* or RAPS).mp.

[mp=title, abstract, original

title, name of substance word, subject heading word, floating sub-heading word, keyword heading word, organism

supplementary concept word, protocol supplementary concept word, rare disease

supplementary concept word, unique

identifier, synonyms] (370)

11 (Cardiac arrest risk triage or Cardiac arrest risk triage score or CART).mp. [mp=title,

abstract, original title,

name of substance word, subject heading word, floating sub-heading word, keyword

heading word, organism supplementary

concept word, protocol supplementary concept word, rare disease supplementary concept

word, unique identifier, synonyms]

(8105)

12 1 or 2 or 3 or 4 (427803)

13 5 or 6 or 7 or 8 or 9 or 10 or 11 (261999)

14 12 and 13 (3575)

15 limit 14 to english language (3347)

16 limit 15 to yr="2020 -Current" (253)

## CINAHL search history

S13 cardiac arrest risk triage or cardiac arrest risk triage score OR Expanders - Apply  
equivalent subjects Interface - EBSCOhost Research Databases 2,617

CART Search modes - Boolean/Phrase Search Screen - Advanced Search

Database - CINAHL

S12 S9 AND S10 Limiters - Published Date: 20200101-20211231 Interface -  
EBSCOhost Research Databases 166

Expanders - Apply equivalent subjects Search Screen - Advanced Search

Search modes - Boolean/Phrase Database - CINAHL

S11 S9 AND S10 Expanders - Apply equivalent subjects Interface - EBSCOhost  
Research Databases 2,432

Search modes - Boolean/Phrase Search Screen - Advanced Search

Database - CINAHL

S10 S3 OR S4 OR S5 OR S6 OR S7 OR S8 Expanders - Apply equivalent subjects  
Interface - EBSCOhost Research Databases 75,896

Search modes - Boolean/Phrase Search Screen - Advanced Search

Database - CINAHL

S9 S1 OR S2 Expanders - Apply equivalent subjects Interface - EBSCOhost  
Research Databases 325,316

Search modes - Boolean/Phrase Search Screen - Advanced Search

Database - CINAHL

S8 cardiac arrest risk triage or cardiac arrest risk triage score OR Expanders - Apply  
equivalent subjects Interface - EBSCOhost Research Databases 2,617

CART Search modes - Boolean/Phrase Search Screen - Advanced Search

Database - CINAHL

S7 rapid acute physiology score\* or rapid acute physiology score Expanders - Apply  
equivalent subjects Interface - EBSCOhost Research Databases 866

system or RAPS Search modes - Boolean/Phrase Search Screen - Advanced  
Search

Database - CINAHL

S6 modified early warning score\* or modified early warning score Expanders - Apply  
equivalent subjects Interface - EBSCOhost Research Databases 276

system\* or MEWS      Search modes - Boolean/Phrase      Search Screen - Advanced Search

Database - CINAHL

S5      national early warning score 2 or national early warning score2      Expanders - Apply  
equivalent subjects      Interface - EBSCOhost Research Databases      72

or NEWS2 or "NEWS 2"      Search modes - Boolean/Phrase      Search Screen -  
Advanced Search

Database - CINAHL

S4      national early warning score\* or national early warning score      Expanders - Apply  
equivalent subjects      Interface - EBSCOhost Research Databases      70,536

system\* or NEWS      Search modes - Boolean/Phrase      Search Screen - Advanced  
Search

Database - CINAHL

S3      early warning sign\* or early warning system\* or early warning      Expanders - Apply  
equivalent subjects      Interface - EBSCOhost Research Databases      2,132

score\* or early warning score or ews or trigger score or "track      Search modes -  
Boolean/Phrase      Search Screen - Advanced Search

and trigger" or "track and trigger system"      Database - CINAHL

S2      emergency department\* or emergency room\* or "accident\*      Expanders - Apply  
equivalent subjects      Interface - EBSCOhost Research Databases      205,895

and emergency" or "accident\* & emergency" or "a&e" or "a &      Search modes -  
Boolean/Phrase      Search Screen - Advanced Search

e" or "A and E" or "ER" or "ED"      Database - CINAHL

S1      paramedic\* or ems or emergency medical service\* or      Expanders - Apply  
equivalent subjects      Interface - EBSCOhost Research Databases      130,491

prehospital or pre-hospital or ambulance\* or emergency      Search modes -  
Boolean/Phrase      Search Screen - Advanced Search

medical technician\* or met OR out-of-hospital or "out of hospital"



## Web of Science Search History

# 13 362

#10 AND #9

Refined by: LANGUAGES: ( ENGLISH ) AND PUBLICATION YEARS: ( 2021 OR 2020 )

Databases= WOS, CCC, KJD, MEDLINE, RSCI, SCIELO Timespan=All years Search  
language=Auto

# 12 2,638

#10 AND #9

Refined by: LANGUAGES: ( ENGLISH )

Databases= WOS, CCC, KJD, MEDLINE, RSCI, SCIELO Timespan=All years Search  
language=Auto

# 11 2,860

#10 AND #9

Databases= WOS, CCC, KJD, MEDLINE, RSCI, SCIELO Timespan=All years Search  
language=Auto

# 10 198,920

#8 OR #7 OR #6 OR #5 OR #4 OR #3

Databases= WOS, CCC, KJD, MEDLINE, RSCI, SCIELO Timespan=All years Search  
language=Auto

# 9 692,366

#2 OR #1

Databases= WOS, CCC, KJD, MEDLINE, RSCI, SCIELO Timespan=All years Search  
language=Auto

# 8 21,363

TOPIC: (Cardiac arrest risk triage or Cardiac arrest risk triage score or CART)

Databases= WOS, CCC, KJD, MEDLINE, RSCI, SCIELO Timespan=All years Search  
language=Auto

# 7 15,559

TOPIC: (rapid acute physiology score\* or rapid acute physiology score system\* or RAPS)

Databases= WOS, CCC, KJD, MEDLINE, RSCI, SCIELO Timespan=All years Search  
language=Auto

# 6 2,095

TOPIC: (modified early warning score\* or modified early warning score system\* or MEWS)

Databases= WOS, CCC, KJD, MEDLINE, RSCI, SCIELO Timespan=All years Search  
language=Auto

# 5 123,039 TOPIC: (national early warning score\* or national early warning score system\* or NEWS)

Databases= WOS, CCC, KJD, MEDLINE, RSCI, SCIELO Timespan=All years Search  
language=Auto

# 4 11,072

TOPIC: (national early warning score 2 or national early warning score system 2 or NEWS2 or NEWS 2)

Databases= WOS, CCC, KJD, MEDLINE, RSCI, SCIELO Timespan=All years Search  
language=Auto

# 3 38,428

TOPIC:(early warning sign\* or early warning system\* or early warning score\* or early warning score system\* or ews or trigger score or "track and trigger" or "track and trigger system\*")

Databases= WOS, CCC, KJD, MEDLINE, RSCI, SCIELO Timespan=All years Search  
language=Auto

# 2 543,490

TOPIC:(emergency department\* or emergency room\* or "accident\* and emergency" or "accident\* & emergency" or "a&e" or "a & e" or "A and E" or "ER" or " ED")

Databases= WOS, CCC, KJD, MEDLINE, RSCI, SCIELO Timespan=All years Search  
language=Auto

# 1 199,218

TOPIC:(paramedic\* or ems or emergency medical service\* or prehospital or pre-hospital or ambulance\* or emergency medical technician\* or emt or out-of- hospital or "out of hospital")

Databases= WOS, CCC, KJD, MEDLINE, RSCI, SCIELO Timespan=All years Search  
language=Auto
