# Supplementary material for: The use of early warning system scores in prehospital and emergency department settings to predict clinical deterioration: A systematic review and meta-analysis
Source: PubMed Central journal article supplement (PMC8929648; doi:10.1371/journal.pone.0265559), 2022-03-17
Supplement: pone.0265559.s004.pdf [file pone.0265559.s004.pdf]

### Supplementary file 3 Risk of Bias

| Study Name                    | Selection Bias | Comparability | Outcome Bias | Final ROB |
|-------------------------------|----------------|---------------|--------------|-----------|
| Jiang, et al. 2019            | ✓              | ✗             | ✓            | ✗         |
| Demircan et al. 2020          | ✓              | ✓             | ✓            | ✓         |
| Mitsunaga et al. 2019         | ✓              | ✓             | ✓            | ✓         |
| Koksal et al. 2016            | ✓              | ✗             | ✓            | ✗         |
| Maftoohian et al. 2020        | ✓              | ✓             | ✓            | ✓         |
| Yuan et al. 2018              | ✓              | ✓             | ✓            | ✓         |
| Dundar et al. 2016            | ✓              | ✓             | ✓            | ✓         |
| Graham et al. 2020            | ✓              | ✓             | ✓            | ✓         |
| Pirneskoski et al. 2019       | ✓              | ✓             | ✓            | ✓         |
| Martin-Rodriguez et al. 2019a | ✓              | ✓             | ✓            | ✓         |
| Martin-Rodriguez et al. 2020a | ✓              | ✓             | ✓            | ✓         |
| Martin-Rodriguez et al. 2019b | ✓              | ✓             | ✓            | ✓         |
| Vihonen et al. 2020           | ✓              | ✓             | ✓            | ✓         |
| Magnusson et al. 2020         | ✓              | ✓             | ✓            | ✓         |
| Martín-Rodríguez et al. 2020b | ✓              | ✓             | ✓            | ✓         |
| Geier,2013                    | ✓              | ✓             | ✓            | ✓         |
| van der Woude,2018            | ✓              | ✓             | ✓            | ✓         |
| Vorwerk,2008                  | ✓              | ✓             | ✓            | ✓         |
| Saeed,2019                    | ✓              | ✓             | ✓            | ✓         |
| Brink,2019                    | ✓              | ✓             | ✓            | ✓         |
